# Supplementary material for: Copy number variation underlies complex phenotypes in domestic dog breeds and other canids
Source: PubMed Central journal article supplement (PMC8092016; doi:10.1101/gr.266049.120), 2021-05
Supplement: supp_gr.266049.120_Supplemental_Material.pdf [file supp_gr.266049.120_Supplemental_Material.pdf]

# Supplemental Material

## Dog breed variation in genomic copy number underlies complex and novel phenotype associations

Aitor Serres-Armero<sup>1</sup>, David Juan<sup>1</sup>, Brian W. Davis<sup>2,3</sup>, Inna S. Povolotskaya<sup>4</sup>, Carlos Morcillo-Suarez<sup>1</sup>, Jocelyn Plassais<sup>2</sup>, Elaine A. Ostrander<sup>2§</sup> and Tomas Marques-Bonet<sup>1,5,6,7§</sup>

<sup>1</sup> IBE, Institut de Biologia Evolutiva (Universitat Pompeu Fabra/CSIC), Ciències Experimentals i de la Salut, Barcelona, 08003, Spain

<sup>2</sup> Cancer Genetics and Comparative Genomics Branch, National Human Genome Research Institute, National Institutes of Health, Bethesda, MD, 20892, USA

<sup>3</sup> Department of Veterinary Integrative Biosciences, College of Veterinary Medicine, Texas A&M University, College Station, TX 77843

<sup>4</sup> Veltischev Research and Clinical Institute for Pediatrics of the Pirogov Russian National Research Medical University, Moscow, Russia

<sup>5</sup> CNAG-CRG, Centre for Genomic Regulation (CRG), The Barcelona Institute of Science and Technology (BIST), Barcelona, Spain

<sup>6</sup> Institutio Catalana de Recerca i Estudis Avançats (ICREA), Barcelona, Catalonia 08010, Spain

<sup>7</sup> Institut Català de Paleontologia Miquel Crusafont, Universitat Autònoma de Barcelona, Cerdanyola del Vallès, Catalonia, Spain

§ Corresponding authors

Email addresses:

ASA: aitor.serres@upf.edu

BWD: bdavis@cvm.tamu.edu

ISP: ipovolotskaya@gmail.com

CMS: carlos.morcillo@upf.edu

JP: jocelyn.plassais@gmail.com

DJ: david.juan@upf.edu

EAO: eostrand@mail.nih.gov

TMB: tomas.marques@upf.edu

# Table of contents

## Supplemental data:

**Supplemental Data S1** – Phenotype table for all samples and traits

**Supplemental Data S2** – Copy number calls for all individuals

**Supplemental Data S3** – Segmental duplication track for the study

**Supplemental Data S4** – Top 0.1% differentiated windows across breed macrogroups containing more than 9 samples

**Supplemental Data S5** – Availability and origin of the samples used for the study

## Supplemental Tables:

**Supplemental Table 1** – Top 0.1 % differentiated windows across dogs, village dogs and wolves

**Supplemental Table 2** – GWAS results table overlapping functional element annotations

**Supplemental Table 3** – GWAS phenotypes and tests

**Supplemental Table 4** – Contingency table of associated CN and highly conserved regions

**Supplemental Table 5** – Association signals within significant Hi-C contacts

## Supplemental Figures:

**Supplemental Figure 1** – Number of samples and phenotypes for analysis

**Supplemental Figure 2** – CNV validation

**Supplemental Figure 3** – CNV distance by chromosome

**Supplemental Figure 4** – CNV based breed phylogeny

**Supplemental Figure 5** – Correlations between CNV and SNV phylogenies

**Supplemental Figure 6** – Proportion of CNV sites in dogs, village dogs and wolves

**Supplemental Figure 7** – CNV interactions between standard breed height genes

**Supplemental Figure 8** – P-value of associated CNV relative to leading SNV distance

**Supplemental Figure 9** – Correlations between lncRNA expression and CNV associations

**Supplemental Figure 10** – Distribution of CNV Hi-C contacts relative to main contact





| Trait code name            | Trait full name               | Type of variable (range)                 | Description                                                                                                                                                                                                               | Test used                               | Number of significant windows | Trait Source           | Included (reason)          |
|----------------------------|-------------------------------|------------------------------------------|---------------------------------------------------------------------------------------------------------------------------------------------------------------------------------------------------------------------------|-----------------------------------------|-------------------------------|------------------------|----------------------------|
| Aggressiveness             | Aggressiveness                | Continuous score (1.5-2.5)               | -                                                                                                                                                                                                                         | Categorical Stratified CMH (two strata) | 0                             | (Plassais et al. 2019) | NO (excess missing)        |
| AOD                        | Age of death                  | Continuous measure                       | Average breed age of death (in years)                                                                                                                                                                                     | Linear Regression (PCA corrected)       | 8                             | (Jones et al. 2008)    | YES                        |
| AttachmentAttentionSeeking | Attachment attention seeking  | Continuous score (0-4)                   | Maintaining close proximity to the owner or other members of the household, soliciting affection or attention, and displaying agitation when the owner gives attention to third parties                                   | Categorical Stratified CMH (two strata) | 0                             | (McLeant et al. 2019)  | YES                        |
| BodyheightF                | Height at the withers females | Continuous measure                       | Average breed height at the withers for females (in cm)                                                                                                                                                                   | Linear Regression (PCA corrected)       | 115                           | ours                   | NO (redundant to Plassais) |
| BodyheightM                | Height at the withers males   | Continuous measure                       | Average breed height at the withers for males (in cm)                                                                                                                                                                     | Linear Regression (PCA corrected)       | 89                            | ours                   | NO (redundant to Plassais) |
| BodyweightF                | Weight females                | Continuous measure                       | Average breed weight for females (in kg)                                                                                                                                                                                  | Linear Regression (PCA corrected)       | 52                            | ours                   | NO (redundant to Plassais) |
| BodyweightM                | Weight males                  | Continuous measure                       | Average breed weight for males (in kg)                                                                                                                                                                                    | Linear Regression (PCA corrected)       | 33                            | ours                   | NO (redundant to Plassais) |
| Boldness                   | Boldness                      | Categorical variable (2 factors)         | -                                                                                                                                                                                                                         | Categorical Stratified CMH (two strata) | 0                             | (Plassais et al. 2019) | NO (excess missing)        |
| Boldness                   | Boldness                      | Categorical variable (2 factors)         | Dog trainer assessment of breed bolness                                                                                                                                                                                   | Categorical Stratified CMH (two strata) | 2                             | (Jones et al. 2008)    | YES                        |
| Bulky                      | Bulky                         | Categorical variable (2 factors)         | Characterized heavy muscling and back fat thickness which is observed in 54% of the large dog breeds                                                                                                                      | Categorical Stratified CMH (two strata) | 34                            | (Plassais et al. 2019) | YES                        |
| Cardiac                    | Cardiac disease propensity    | Rank variable                            | Ranking of dog breeds based on the normalized number of heart related disease diagnostics                                                                                                                                 | Categorical non-stratified CMH          | 0                             | OFA                    | YES                        |
| Cataract                   | Cataract disease propensity   | Rank variable                            | Ranking of dog breeds based on the normalized number of cataract diagnostics                                                                                                                                              | Categorical Stratified CMH (two strata) | 0                             | OFA                    | YES                        |
| Chasing                    | Chasing                       | Continuous score (0-4)                   | Chasing cats, birds, and/or other small animals, given the opportunity                                                                                                                                                    | Categorical non-stratified CMH          | 0                             | (McLeant et al. 2019)  | YES                        |
| chest_rat_nn               | Chest to body ratio           | Percentage (0-1)                         | Average breed chest to body ratio (see reference)                                                                                                                                                                         | Categorical non-stratified CMH          | 13                            | (Jones et al. 2008)    | YES                        |
| DogDirectedAggression      | Dog directed aggression       | Continuous score (0-4)                   | Threatening or hostile responses when approached by unfamiliar dogs                                                                                                                                                       | Categorical non-stratified CMH          | 7                             | (McLeant et al. 2019)  | YES                        |
| DogDirectedFear            | Dog directed fear             | Continuous score (0-4)                   | Fearful or wary responses when approached by unfamiliar dogs                                                                                                                                                              | Categorical non-stratified CMH          | 0                             | (McLeant et al. 2019)  | YES                        |
| DogRivalry                 | Dog rivalry                   | Continuous score (0-4)                   | Threatening or hostile responses to other familiar dogs in the same household                                                                                                                                             | Categorical Stratified CMH (two strata) | 0                             | (McLeant et al. 2019)  | YES                        |
| Dropears                   | Drop ears                     | Categorical variable (2 factors)         | Does the dog have hanging ears (1:no, 2:yes)?                                                                                                                                                                             | Categorical non-stratified CMH          | 22                            | (Plassais et al. 2019) | YES                        |
| Earbend                    | Ear bend                      | Categorical variable (4 factors)         | Breed ear bend scaled from 1 (hanging low) to 4 (completely erect)                                                                                                                                                        | Categorical non-stratified CMH          | 31                            | (Jones et al. 2008)    | YES                        |
| Ectropion                  | Ectropion disease propensity  | Rank variable                            | Ranking of dog breeds based on the normalized number of ectropion diagnostics                                                                                                                                             | -                                       | 0                             | OFA                    | NO (excess missing)        |
| ElbowDysplasia             | Elbow dysplasia               | Rank variable                            | Ranking of dog breeds based on the normalized number of elbow dysplasia diagnostics                                                                                                                                       | Categorical non-stratified CMH          | 6                             | OFA                    | YES                        |
| EnergyLevel                | Energy level                  | Continuous score (0-4)                   | Energetic, "always on the go", and/or playful                                                                                                                                                                             | Categorical non-stratified CMH          | 6                             | (McLeant et al. 2019)  | YES                        |
| excitability               | Excitability                  | Discrete (ordinal) variable (10 factors) | Data on how excitable a breed is taken from Hart and Miller (1985)                                                                                                                                                        | Categorical Stratified CMH (two strata) | 0                             | (Jones et al. 2008)    | YES                        |
| Excitability               | Excitability                  | Continuous score (0-4)                   | Displaying strong reactions to potentially exciting or arousing events, such as going for walks or car trips, doorbells, arrival of visitors, and the owner arriving home; has difficulty settling down after such events | Categorical non-stratified CMH          | 15                            | (McLeant et al. 2019)  | YES                        |
| Fighting                   | Fighting                      | Categorical variable (2 factors)         | Is the dog breed commonly used in dog fights?                                                                                                                                                                             | Categorical non-stratified CMH          | 0                             | ours                   | YES                        |
| Furnish                    | Furnish                       | Categorical variable (2 factors)         | Do the breeds have furnishings (mustache, beard, or eyebrows) (1:no, 2:yes)?                                                                                                                                              | Categorical Stratified CMH (two strata) | 22                            | (Plassais et al. 2019) | YES                        |
| Hairlength                 | Hairlength                    | Discrete (ordinal) variable (4 factors)  | Breed standard report of hair length categories are Long, Medium, Short and Hairless                                                                                                                                      | Categorical non-stratified CMH          | 72                            | ours                   | YES                        |
| Hairless                   | Hairless                      | Categorical variable (2 factors)         | Is the dog breed hairless?                                                                                                                                                                                                | Categorical Stratified CMH (two strata) | 0                             | (Plassais et al. 2019) | YES                        |
| Headratio                  | Head ratio                    | Percentage (0-1)                         | Average breed head to body ratio (see reference)                                                                                                                                                                          | Categorical Stratified CMH (two strata) | 0                             | (Jones et al. 2008)    | YES                        |
| Height                     | Height                        | Continuous measure                       | Average breed height at the withers (in in)                                                                                                                                                                               | Linear Regression (PCA corrected)       | 10                            | (Plassais et al. 2019) | YES                        |
| Herding                    | Herding                       | Categorical variable (2 factors)         | Is the dog breed commonly used for herding animals?                                                                                                                                                                       | Categorical non-stratified CMH          | 23                            | (Jones et al. 2008)    | YES                        |
| HipDysplasia               | Hip dysplasia propensity      | Rank variable                            | Ranking of dog breeds based on the normalized number of elbow dysplasia diagnostics                                                                                                                                       | Categorical non-stratified CMH          | 0                             | OFA                    | YES                        |
| HT                         | Height at the withers         | Continuous measure                       | Average breed height at the withers (in in)                                                                                                                                                                               | Categorical non-stratified CMH          | 61                            | (Jones et al. 2008)    | NO (redundant to Plassais) |
| IgA                        | Immunoglobulin A production   | Continuous score (0.08-0.75)             | Breed average ELISA IgA titration                                                                                                                                                                                         | -                                       | 0                             | (Olsson et al. 2014)   | NO (excess missing)        |

| <b>(continuation)</b>      |                                           |                                         |                                                                                                                                                                                                                           |                                         |                                      |                        |                               |
|----------------------------|-------------------------------------------|-----------------------------------------|---------------------------------------------------------------------------------------------------------------------------------------------------------------------------------------------------------------------------|-----------------------------------------|--------------------------------------|------------------------|-------------------------------|
| <b>Trait code name</b>     | <b>Trait full name</b>                    | <b>Type of variable (range)</b>         | <b>Description</b>                                                                                                                                                                                                        | <b>Test used</b>                        | <b>Number of significant windows</b> | <b>Trait Source</b>    | <b>Included (reason)</b>      |
| Intelligence               | Intelligence                              | Discrete (ordinal) variable (6 factors) | Breed score on memory and trainability (see reference)                                                                                                                                                                    | Categorical non-stratified CMH          | 0                                    | ours                   | YES                           |
| Lageears                   | Large ears                                | Categorical variable (2 factors)        | Does the breed have characteristically large ears (1:no, 2:yes)?                                                                                                                                                          | Categorical non-stratified CMH          | 25                                   | (Plassais et al. 2019) | YES                           |
| Legratio                   | Leg ratio                                 | Percentage (0-1)                        | Average breed leg to body ratio (see reference)                                                                                                                                                                           | Categorical Stratified CMH (two strata) | 1                                    | (Jones et al. 2008)    | YES                           |
| Lenghoffur                 | Length of fur                             | Categorical variable (2 factors)        | Report of fur length (1:short, 2:long)                                                                                                                                                                                    | Categorical non-stratified CMH          | 5                                    | (Plassais et al. 2019) | YES                           |
| Lifespan                   | Lifespan                                  | Continuous measure                      | Average breed age of death (in years)                                                                                                                                                                                     | Linear Regression (PCA corrected)       | 5                                    | (Plassais et al. 2019) | YES                           |
| Lifespan                   | Lifespan                                  | Continuous measure                      | Average breed age of death (in years)                                                                                                                                                                                     | Linear Regression (PCA corrected)       | 7                                    | ours                   | YES                           |
| Littersize                 | Litter size                               | Continuous measure                      | Average breed litter count                                                                                                                                                                                                | Linear Regression (PCA corrected)       | 74                                   | (Borge et al. 2011)    | YES                           |
| Longlegs                   | Long legs                                 | Categorical variable (2 factors)        | Is the breed considered a sighthound (1:no, 2:yes)?                                                                                                                                                                       | -                                       | 2                                    | (Plassais et al. 2019) | NO (excess missing)           |
| Musclcd                    | Musclcd                                   | Categorical variable (2 factors)        | Similar to the bulky phenotype but considering small breeds as well                                                                                                                                                       | Categorical non-stratified CMH          | 4                                    | (Plassais et al. 2019) | YES                           |
| Neckratio                  | Neck to body ratio                        | Percentage (0-1)                        | Average breed neck to body ratio (see reference)                                                                                                                                                                          | Categorical non-stratified CMH          | 6                                    | (Jones et al. 2008)    | YES                           |
| NonsocialFear              | Nonsocial fear                            | Continuous score (0-4)                  | Fearful or wary responses to sudden or loud noises, traffic, and unfamiliar objects and situations                                                                                                                        | Categorical Stratified CMH (two strata) | 0                                    | (McLeant et al. 2019)  | YES                           |
| OwnerDirectedAggression    | Owner directed aggression                 | Continuous score (0-4)                  | Threatening or hostile responses to the owner or other members of the household when challenged, manhandled, stared at, stepped over, or when approached while in possession of food or objects                           | Categorical non-stratified CMH          | 0                                    | (McLeant et al. 2019)  | YES                           |
| PatellarLuxation           | Patellar luxation propensity              | Rank variable                           | Ranking of dog breeds based on the normalized number of patellar luxation diagnostics                                                                                                                                     | Categorical non-stratified CMH          | 4                                    | OFA                    | YES (close to excess missing) |
| RetinalAtrophy             | Retinal atrophy (generalized) propensity  | Rank variable                           | Ranking of dog breeds based on the normalized number of generalized retinal atrophy diagnostics                                                                                                                           | Categorical non-stratified CMH          | 1                                    | OFA                    | YES                           |
| SeparationRelatedBehavior  | Separation related behavior               | Continuous score (0-4)                  | Vocalizing and/or destructiveness when separated from the owner, often accompanied or preceded by behavioral and autonomic signs of anxiety including restlessness, loss of appetite, trembling, and excessive salivation | Categorical Stratified CMH (two strata) | 3                                    | (McLeant et al. 2019)  | YES                           |
| Shortcoat                  | Short coat                                | Categorical variable (2 factors)        | Coded with 1 for breeds with a very short coat and 0 for the rest                                                                                                                                                         | Categorical non-stratified CMH          | 1                                    | (Jones et al. 2008)    | YES                           |
| SighthoundRacing           | Sighthound racing                         | Categorical variable (2 factors)        | Is the dog breed used in dog races/has a sighthound phenotype?                                                                                                                                                            | Categorical Stratified CMH (two strata) | 1                                    | ours                   | YES                           |
| Smell                      | Smell                                     | Categorical variable (2 factors)        | Is the dog breed commonly used for smell detection (explosives, drugs ...)                                                                                                                                                | Categorical Stratified CMH (two strata) | 0                                    | ours                   | YES                           |
| Snoutangle                 | Snout angle                               | Continuous score (75-209)               | Average breed angle from muzzle to stop                                                                                                                                                                                   | Categorical non-stratified CMH          | 0                                    | (Jones et al. 2008)    | YES                           |
| Snoutratio                 | Snout to body ratio                       | Percentage (0-1)                        | Average breed snout to body ratio (see reference)                                                                                                                                                                         | Categorical non-stratified CMH          | 0                                    | (Jones et al. 2008)    | YES                           |
| StrangerDirectedAggression | Stranger directed aggression              | Continuous score (0-4)                  | Threatening or hostile responses to strangers approaching or invading the dog's or owner's personal space, territory, or home range                                                                                       | Categorical non-stratified CMH          | 0                                    | (McLeant et al. 2019)  | YES                           |
| StrangerDirectedFear       | Stranger directed fear                    | Continuous score (0-4)                  | Fearful or wary responses when approached by strangers                                                                                                                                                                    | Categorical Stratified CMH (two strata) | 0                                    | (McLeant et al. 2019)  | YES                           |
| Tailcurl                   | Tail curl                                 | Discrete (ordinal) variable (4 factors) | Breed degree of curve in the tail on a scale of 1 (straight) to 4 (tightly curled)                                                                                                                                        | Categorical Stratified CMH (two strata) | 0                                    | (Plassais et al. 2019) | YES (close to excess missing) |
| Tailcurve                  | Tail curve                                | Discrete (ordinal) variable (5 factors) | Breed degree of curve in the tail on a scale of 1 (straight) to 5 (tightly curled)                                                                                                                                        | Categorical Stratified CMH (two strata) | 17                                   | (Jones et al. 2008)    | YES                           |
| Tailratio                  | Tail to body ratio                        | Percentage (0-1)                        | Average breed tail to body ratio (see reference)                                                                                                                                                                          | Categorical non-stratified CMH          | 9                                    | (Jones et al. 2008)    | YES                           |
| Temperament                | Temperament                               | Continuous score (0-100)                | Average breed score on obedience and command memorization (see reference)                                                                                                                                                 | Categorical Stratified CMH (two strata) | 0                                    | ATTS                   | YES                           |
| Thyroid                    | Thyroid                                   | Rank variable                           | Ranking of dog breeds based on the normalized number of thyroid related disease diagnostics                                                                                                                               | Categorical non-stratified CMH          | 0                                    | OFA                    | YES (close to excess missing) |
| TouchSensitivity           | Touch sensitivity                         | Continuous score (0-4)                  | Fearful or wary responses to potentially painful procedures, including bathing, grooming, nail-clipping, and veterinary examinations                                                                                      | Categorical Stratified CMH (two strata) | 5                                    | (McLeant et al. 2019)  | YES                           |
| Trainability               | Trainability                              | Categorical variable (2 factors)        | Dog trainer assessment of how easily a breed can be trained                                                                                                                                                               | Categorical non-stratified CMH          | 1                                    | (Jones et al. 2008)    | YES                           |
| Trainability               | Trainability                              | Continuous score (0-4)                  | Willingness to attend to the owner, obey simple commands, learn quickly, fetch objects, respond positively to correction, and ignore distracting stimuli                                                                  | Categorical non-stratified CMH          | 2                                    | (McLeant et al. 2019)  | YES                           |
| Weight                     | Weight                                    | Continuous measure                      | Average breed weight (in lb)                                                                                                                                                                                              | Linear Regression (PCA corrected)       | 15                                   | (Plassais et al. 2019) | YES                           |
| Whitechest                 | White chest                               | Categorical variable (2 factors)        | Is the breed's chest fur white?                                                                                                                                                                                           | Categorical non-stratified CMH          | 0                                    | (Plassais et al. 2019) | YES                           |
| Whitehead                  | White head                                | Categorical variable (2 factors)        | Is the breed's head fur white?                                                                                                                                                                                            | Categorical Stratified CMH (two strata) | 0                                    | (Plassais et al. 2019) | YES (close to excess missing) |
| WT0.33resid                | Residual of weight to lifespan regression | Continuous score (-0.67-0.79)           | Regression residual of breed average lifespan vs weight                                                                                                                                                                   | Linear Regression (PCA corrected)       | 45                                   | (Jones et al. 2008)    | YES                           |
| WT                         | Weight                                    | Continuous measure                      | Average breed weight (in lb)                                                                                                                                                                                              | Linear Regression (PCA corrected)       | 14                                   | (Jones et al. 2008)    | NO (redundant to Plassais)    |

**Supplemental Table S3 – Description of GWAS phenotypes, number of association signals and test performed.**

| Non-Exonic CNV duplications | Conserved | Non-Conserved |            |
|-----------------------------|-----------|---------------|------------|
| Associated                  | 8         | 53            | P-val=0.38 |
| Non-associated              | 394       | 3680          |            |

| Non-Exonic CNV Deletions | Conserved | Non-Conserved |            |
|--------------------------|-----------|---------------|------------|
| Associated               | 51        | 238           | P-val=0.15 |
| Non-associated           | 10630     | 39278         |            |

| Non-Exonic CNV all | Conserved | Non-Conserved |            |
|--------------------|-----------|---------------|------------|
| Associated         | 59        | 281           | P-val=0.15 |
| Non-associated     | 10931     | 42214         |            |

**Supplemental Table S4** – Contingency table of conserved elements inside and outside associated windows.



| Chromosome | Start    | End      | Ensembl_transcript | Feature_name   | Trait        |
|------------|----------|----------|--------------------|----------------|--------------|
| Chr26      | 11696564 | 11708211 | ENSCAFT00000014674 | TBX3           | BodyheightF  |
| Chr7       | 44336287 | 44363163 | ENSCAFT00000027863 | HDHD2          | BodyheightF  |
| Chr7       | 44370296 | 44413497 | ENSCAFT00000027875 | KATNAL2        | BodyheightF  |
| Chr7       | 44309588 | 44363129 | ENSCAFT00000035344 | HDHD2          | BodyheightF  |
| Chr7       | 44338091 | 44437346 | ENSCAFT00000042868 | KATNAL2        | BodyheightF  |
| Chr7       | 44372262 | 44412793 | ENSCAFT00000044953 | KATNAL2        | BodyheightF  |
| Chr7       | 44370299 | 44587494 | ENSCAFT00000045108 | KATNAL2        | BodyheightF  |
| Chr26      | 11697220 | 11708211 | ENSCAFT00000046183 | TBX3           | BodyheightF  |
| Chr26      | 11666482 | 11667175 | ENSCAFT00000053431 | lincRNA        | BodyheightF  |
| Chr26      | 11696564 | 11708211 | ENSCAFT00000014674 | TBX3           | BodyheightM  |
| Chr7       | 44336287 | 44363163 | ENSCAFT00000027863 | HDHD2          | BodyheightM  |
| Chr7       | 44370296 | 44413497 | ENSCAFT00000027875 | KATNAL2        | BodyheightM  |
| Chr7       | 44309588 | 44363129 | ENSCAFT00000035344 | HDHD2          | BodyheightM  |
| Chr17      | 36199018 | 36202608 | ENSCAFT00000035694 | protein_coding | BodyheightM  |
| Chr7       | 44338091 | 44437346 | ENSCAFT00000042868 | KATNAL2        | BodyheightM  |
| Chr7       | 44372262 | 44412793 | ENSCAFT00000044953 | KATNAL2        | BodyheightM  |
| Chr7       | 44370299 | 44587494 | ENSCAFT00000045108 | KATNAL2        | BodyheightM  |
| Chr26      | 11697220 | 11708211 | ENSCAFT00000046183 | TBX3           | BodyheightM  |
| Chr17      | 36165207 | 36167595 | ENSCAFT00000051403 | lincRNA        | BodyheightM  |
| Chr17      | 36178287 | 36180035 | ENSCAFT00000052000 | lincRNA        | BodyheightM  |
| Chr17      | 35841306 | 36076836 | ENSCAFT00000052207 | lincRNA        | BodyheightM  |
| Chr26      | 11666482 | 11667175 | ENSCAFT00000053431 | lincRNA        | BodyheightM  |
| Chr17      | 36009692 | 36127383 | ENSCAFT00000053686 | lincRNA        | BodyheightM  |
| Chr17      | 35943579 | 35945825 | ENSCAFT00000056000 | lincRNA        | BodyheightM  |
| Chr26      | 11696564 | 11708211 | ENSCAFT00000014674 | TBX3           | BodyweightF  |
| Chr7       | 44336287 | 44363163 | ENSCAFT00000027863 | HDHD2          | BodyweightF  |
| Chr7       | 44370296 | 44413497 | ENSCAFT00000027875 | KATNAL2        | BodyweightF  |
| Chr7       | 44309588 | 44363129 | ENSCAFT00000035344 | HDHD2          | BodyweightF  |
| Chr7       | 44338091 | 44437346 | ENSCAFT00000042868 | KATNAL2        | BodyweightF  |
| Chr7       | 44372262 | 44412793 | ENSCAFT00000044953 | KATNAL2        | BodyweightF  |
| Chr7       | 44370299 | 44587494 | ENSCAFT00000045108 | KATNAL2        | BodyweightF  |
| Chr26      | 11697220 | 11708211 | ENSCAFT00000046183 | TBX3           | BodyweightF  |
| Chr26      | 11666482 | 11667175 | ENSCAFT00000053431 | lincRNA        | BodyweightF  |
| Chr26      | 11696564 | 11708211 | ENSCAFT00000014674 | TBX3           | BodyweightM  |
| Chr7       | 44336287 | 44363163 | ENSCAFT00000027863 | HDHD2          | BodyweightM  |
| Chr7       | 44370296 | 44413497 | ENSCAFT00000027875 | KATNAL2        | BodyweightM  |
| Chr7       | 44309588 | 44363129 | ENSCAFT00000035344 | HDHD2          | BodyweightM  |
| Chr17      | 36199018 | 36202608 | ENSCAFT00000035694 | protein_coding | BodyweightM  |
| Chr7       | 44338091 | 44437346 | ENSCAFT00000042868 | KATNAL2        | BodyweightM  |
| Chr7       | 44372262 | 44412793 | ENSCAFT00000044953 | KATNAL2        | BodyweightM  |
| Chr7       | 44370299 | 44587494 | ENSCAFT00000045108 | KATNAL2        | BodyweightM  |
| Chr26      | 11697220 | 11708211 | ENSCAFT00000046183 | TBX3           | BodyweightM  |
| Chr17      | 36165207 | 36167595 | ENSCAFT00000051403 | lincRNA        | BodyweightM  |
| Chr17      | 36178287 | 36180035 | ENSCAFT00000052000 | lincRNA        | BodyweightM  |
| Chr17      | 35841306 | 36076836 | ENSCAFT00000052207 | lincRNA        | BodyweightM  |
| Chr26      | 11666482 | 11667175 | ENSCAFT00000053431 | lincRNA        | BodyweightM  |
| Chr17      | 36009692 | 36127383 | ENSCAFT00000053686 | lincRNA        | BodyweightM  |
| Chr17      | 35943579 | 35945825 | ENSCAFT00000056000 | lincRNA        | BodyweightM  |
| Chr33      | 785672   | 1092293  | ENSCAFT00000014024 | EPHA3          | Hairlength   |
| Chr37      | 6432400  | 6499256  | ENSCAFT00000017095 | PGAP1          | Hairlength   |
| Chr9       | 15840678 | 15962428 | ENSCAFT00000017124 | MAP2K6         | Hairlength   |
| Chr9       | 17334729 | 17340976 | ENSCAFT00000021268 | protein_coding | Hairlength   |
| Chr33      | 1129049  | 1129156  | ENSCAFT00000040553 | RF00019        | Hairlength   |
| Chr9       | 17335270 | 17341774 | ENSCAFT00000043194 | protein_coding | Hairlength   |
| Chr37      | 6423290  | 6499361  | ENSCAFT00000043813 | PGAP1          | Hairlength   |
| Chr9       | 17335270 | 17340910 | ENSCAFT00000050102 | protein_coding | Hairlength   |
| Chr33      | 1143849  | 1149164  | ENSCAFT00000052066 | lincRNA        | Hairlength   |
| Chr33      | 1126850  | 1128113  | ENSCAFT00000053824 | lincRNA        | Hairlength   |
| Chr23      | 18984614 | 19058869 | ENSCAFT00000057582 | lincRNA        | Hairlength   |
| Chr23      | 19032257 | 19058869 | ENSCAFT00000057649 | lincRNA        | Hairlength   |
| Chr23      | 19032506 | 19103277 | ENSCAFT00000059093 | lincRNA        | Hairlength   |
| Chr33      | 1147978  | 1150689  | ENSCAFT00000059143 | lincRNA        | Hairlength   |
| Chr12      | 65087461 | 65120744 | ENSCAFT00000006043 | OSTM1          | Intelligence |
| Chr4       | 64777068 | 65160441 | ENSCAFT00000029386 | HCN1           | Intelligence |
| Chr1       | 7926235  | 7931932  | ENSCAFT00000044917 | protein_coding | Intelligence |
| Chr4       | 64776432 | 65163127 | ENSCAFT00000049582 | HCN1           | Intelligence |
| Chr7       | 44336287 | 44363163 | ENSCAFT00000027863 | HDHD2          | Lifespan     |
| Chr7       | 44370296 | 44413497 | ENSCAFT00000027875 | KATNAL2        | Lifespan     |
| Chr7       | 44309588 | 44363129 | ENSCAFT00000035344 | HDHD2          | Lifespan     |
| Chr7       | 44338091 | 44437346 | ENSCAFT00000042868 | KATNAL2        | Lifespan     |
| Chr7       | 44372262 | 44412793 | ENSCAFT00000044953 | KATNAL2        | Lifespan     |
| Chr7       | 44370299 | 44587494 | ENSCAFT00000045108 | KATNAL2        | Lifespan     |
| Chr7       | 44336287 | 44363163 | ENSCAFT00000027863 | HDHD2          | Littersize   |
| Chr7       | 44370296 | 44413497 | ENSCAFT00000027875 | KATNAL2        | Littersize   |
| Chr7       | 44309588 | 44363129 | ENSCAFT00000035344 | HDHD2          | Littersize   |
| Chr7       | 44338091 | 44437346 | ENSCAFT00000042868 | KATNAL2        | Littersize   |
| Chr7       | 44372262 | 44412793 | ENSCAFT00000044953 | KATNAL2        | Littersize   |
| Chr7       | 44370299 | 44587494 | ENSCAFT00000045108 | KATNAL2        | Littersize   |

Supplemental Table S5 – Hi-C contacts containing associated genes.



$$\square \approx 5 \quad N_{\text{Dog}} = 265 \quad N_{\text{Village}} = 110 \quad N_{\text{Wolf}} = 38$$

$$\square \approx 1 \quad N_{\text{trait}} = 58 \rightarrow N_{\text{tr-assoc}} = \frac{31}{58} \rightarrow N_{\text{assoc}} = 482$$

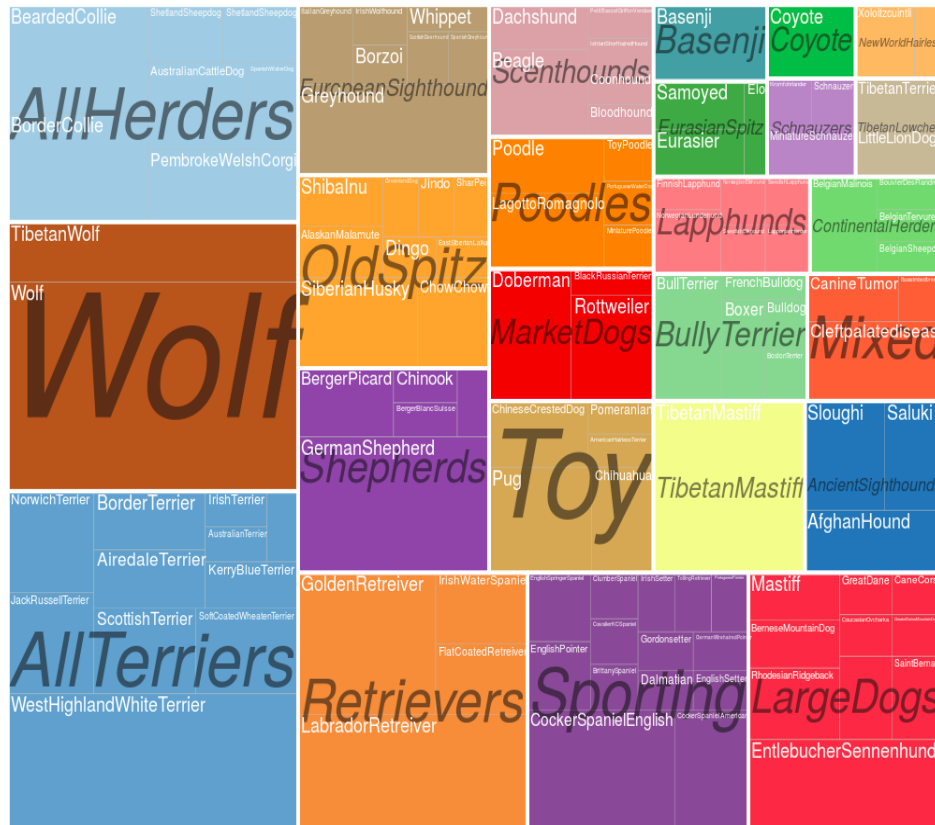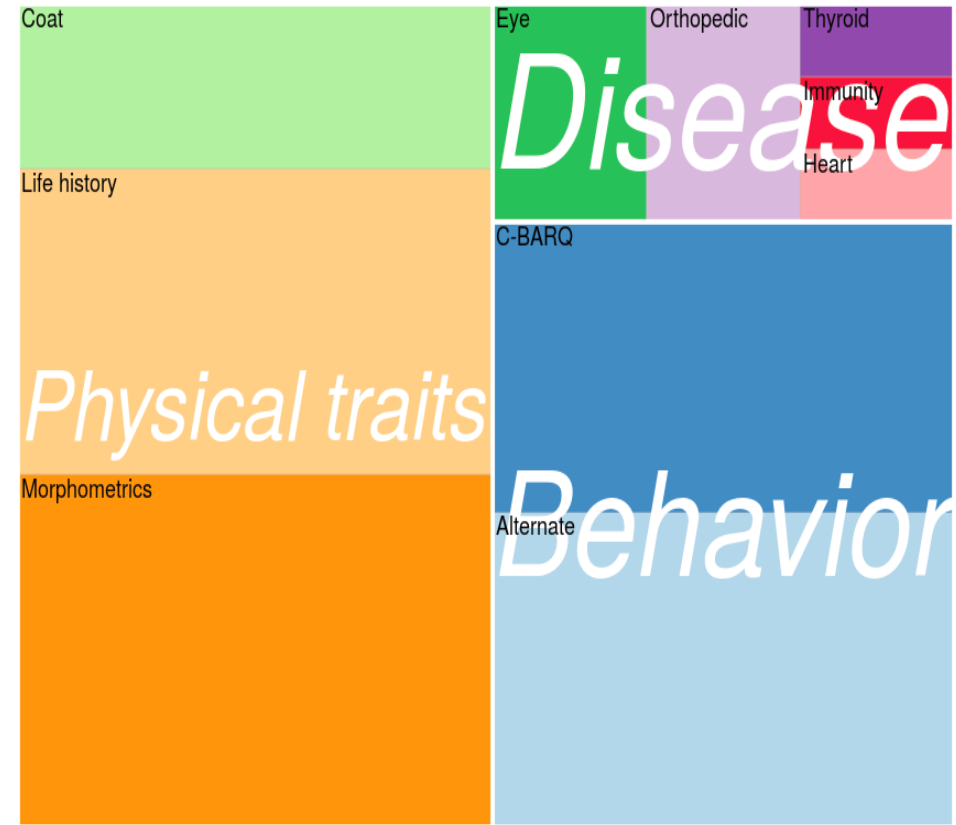

**Supplemental Figure S1** – Visual representation of sample and phenotype numbers. Left: samples partitioned by breed and clade; on the top is a square representing the number of samples per area unit and the absolute number of dogs, village dogs and wolves. Right: phenotypes partitioned by type; on the top is a square representing the number of traits per area unit and the absolute number of traits, the fraction of traits with at least one CNV association and the total number of CNV associations across all traits.

|         | Original panel |            | aCGH panel      |          |
|---------|----------------|------------|-----------------|----------|
| Data    | WGS            | 301        | Nimblegen2M     | 64       |
|         |                |            | Nimblegen100K   | 64       |
|         |                |            | NimblegenCustom | 14       |
| Species | Breed(#)       | 263 (~100) | Breed(#)        | 128 (32) |
|         | Wolves         | 38         | Wolves          | 14       |

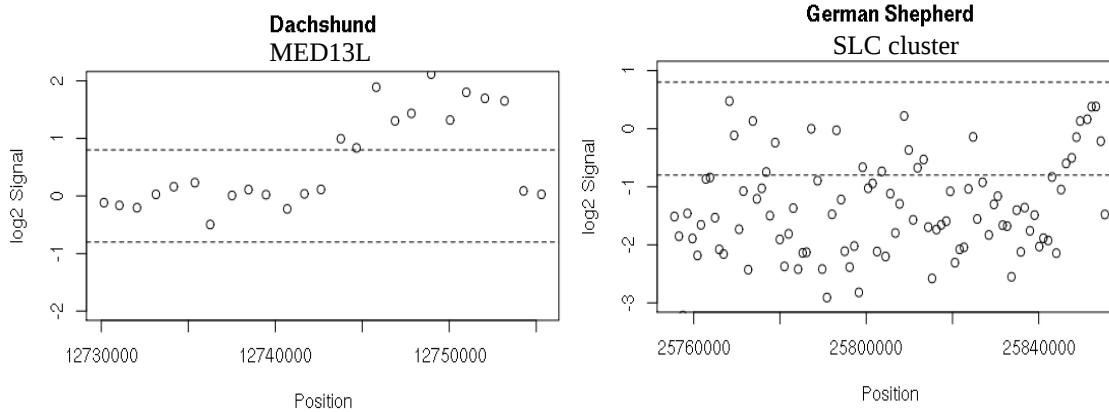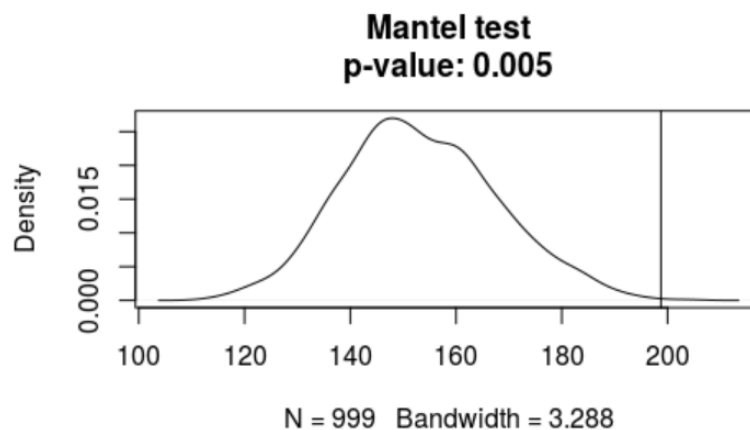

**Supplemental Figure S2** – The frequencies of 12 CNV loci were assessed in 32 breeds common between our WGS panel and an array comparative genomics (aCGH) cohort (Ramirez et al. 2014; Nicholas et al. 2011; Berglund et al. 2012).

Top: table of the samples used for validation. The total number of samples and breeds in the WGS and the aCGH panels is represented.

Middle: two examples of validated CNVs with concordant gain-loss status in WGS and aCGH. aCGH probe signal intensity is plotted in the y axis against probe coordinates. Per-breed CNV frequencies were determined based on gain-loss concordance as depicted in these examples.

Bottom: global validation of CNV locus frequencies per breed. The similarity between frequency matrices resulting from both platforms was assessed using a mantel test. Per locus concordance was also assessed via correlation (data not shown).

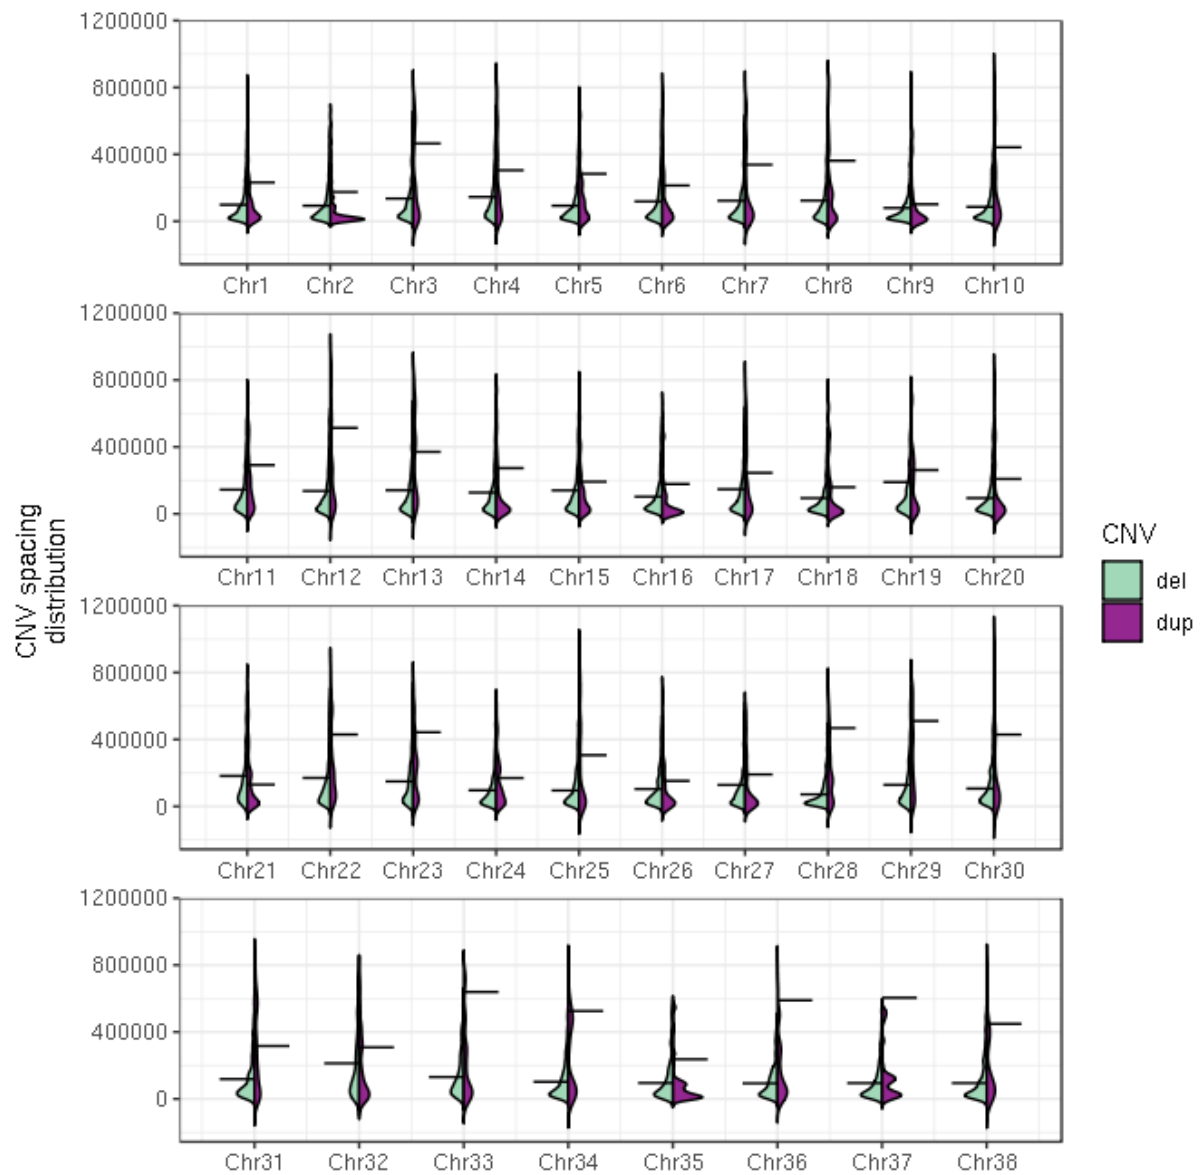

**Supplemental Figure S3** – Violin plots of CNV distances per dog chromosome. The distributions of duplications and deletions are colored purple and turquoise respectively. The protruding lines on each violin plot correspond to the expected distance between events if they were evenly distributed along a chromosome. They were calculated by dividing the available chromosome space (length of the chromosome minus length of repeats and CNVs within that chromosome) by the number of CNV events in each respective chromosome. The expected distance between duplications is significantly larger than expected under an exponential distribution of our data points, meaning that duplications tend to cluster. The expected distance between deletions is not significant. (Bonferroni-corrected, Fisher-aggregated exponential distribution test for expected distance  $p\text{-value}_{\text{duplications}}=0.006$  and  $p\text{-value}_{\text{deletions}}=0.9$ ).

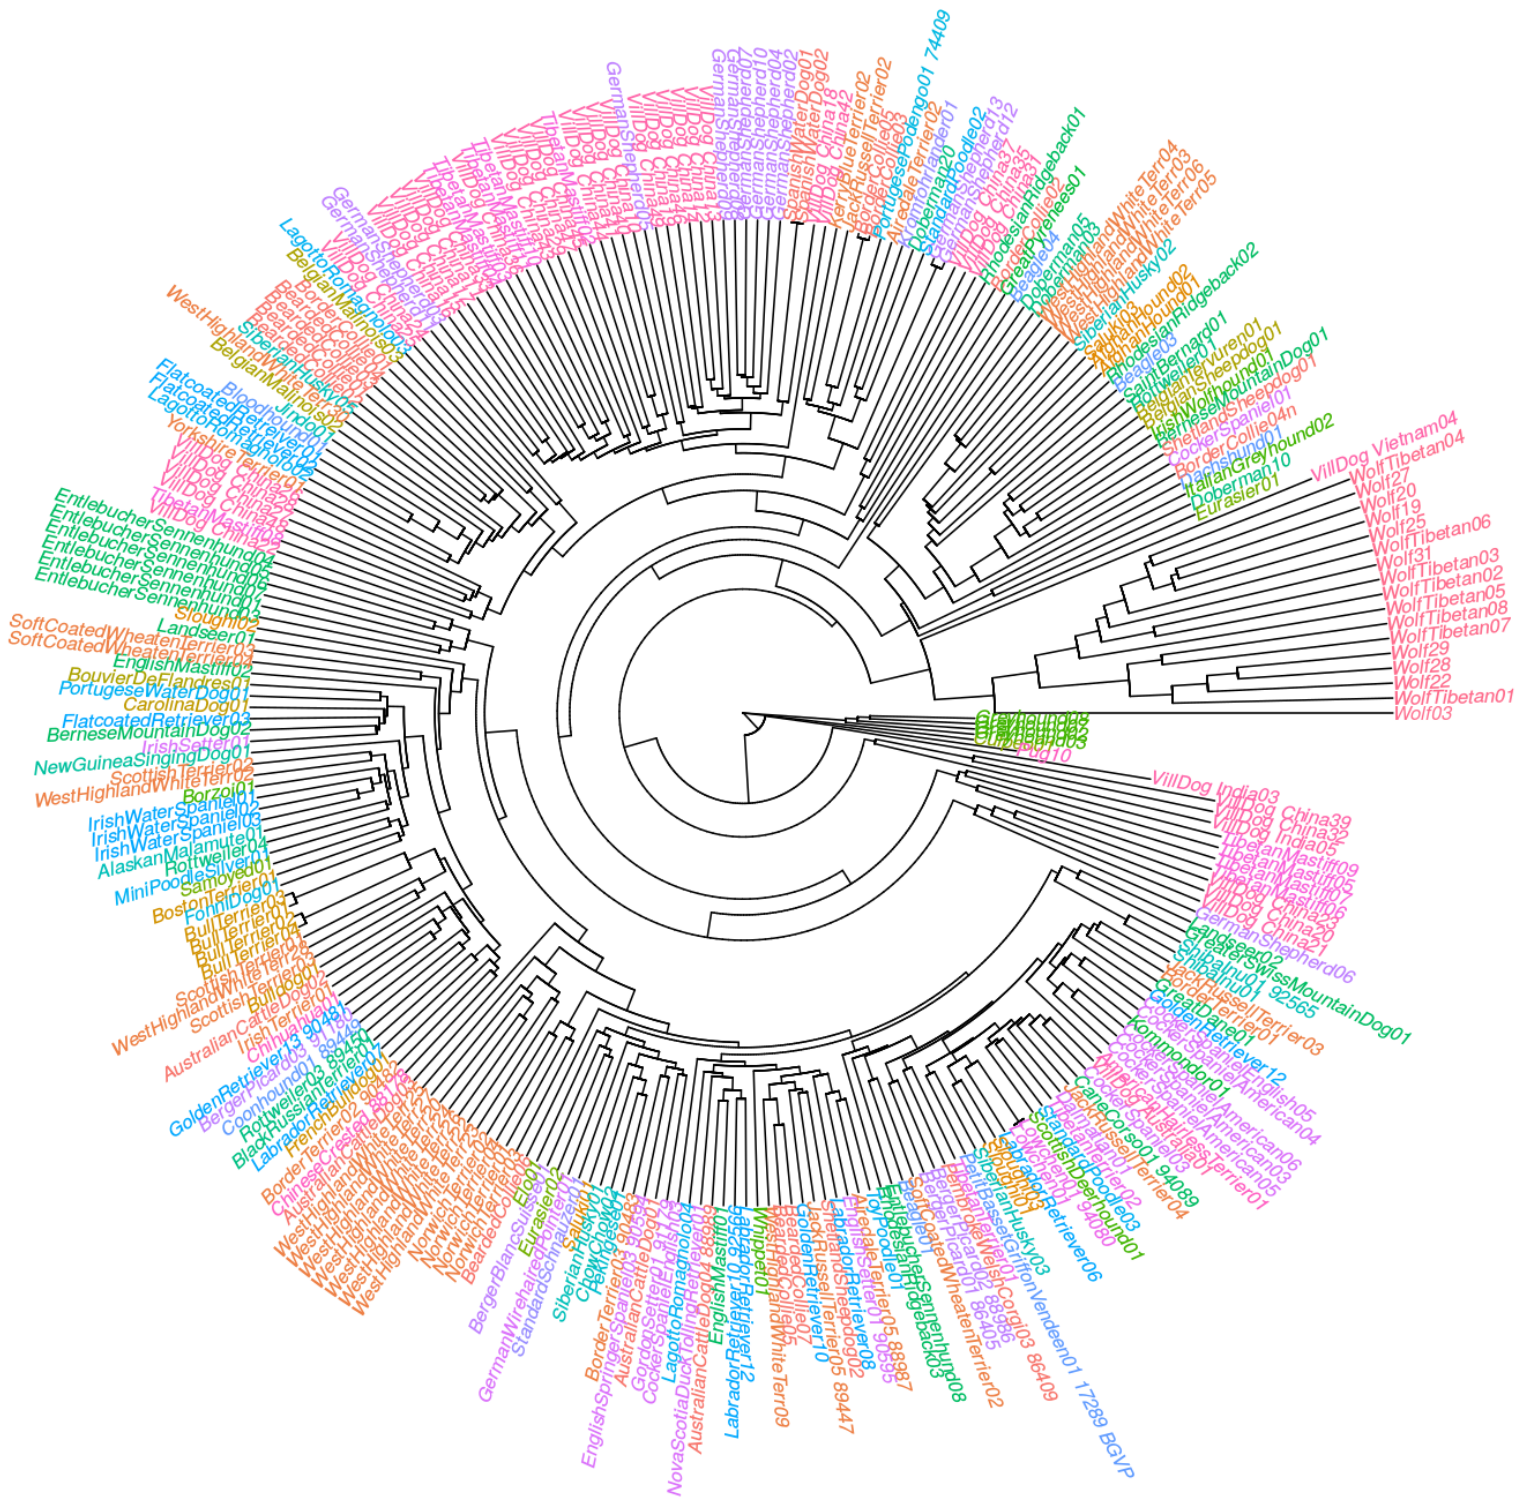

**Supplemental Figure S4** – Breed phylogeny using CNVs. Breed macrogroups are colored accordingly. Contrary to haplogroup and IBD trees, we observe sparse clustering by macrogroup aside from individuals belonging to the same breed, pointing to an unstratified nature of the data.

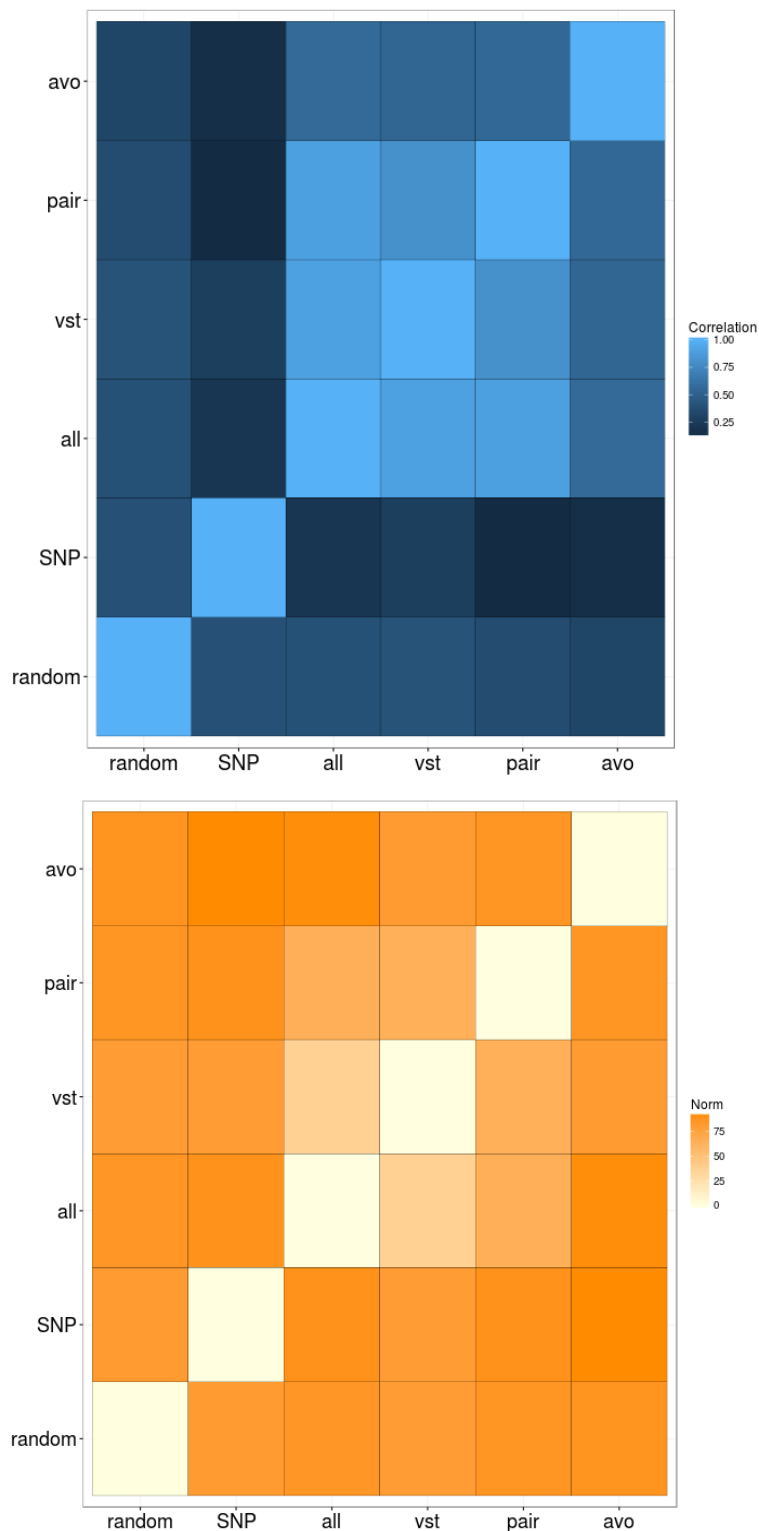

**Supplemental Figure S5** – Breed phylogeny CNV comparison to Haplotype based trees. Random: randomly generated distance matrix (zero similarity); SNP: Haplotype based distance matrix; all: distance matrix using all structural variation; vst: distance matrix using only breed-differentiated structural variants; pair: distance matrix using all structural variants but excluding breed-admixed haplotypes for each pair of breeds. avo: distance matrix using all structural variants but excluding any breed-admixed haplotypes across all breeds. Top/blue: distance matrix correlation; Bottom/orange: 2-norm scaled matrix distance. On a global scale, we see little similarity to the basic SNP tree topology.

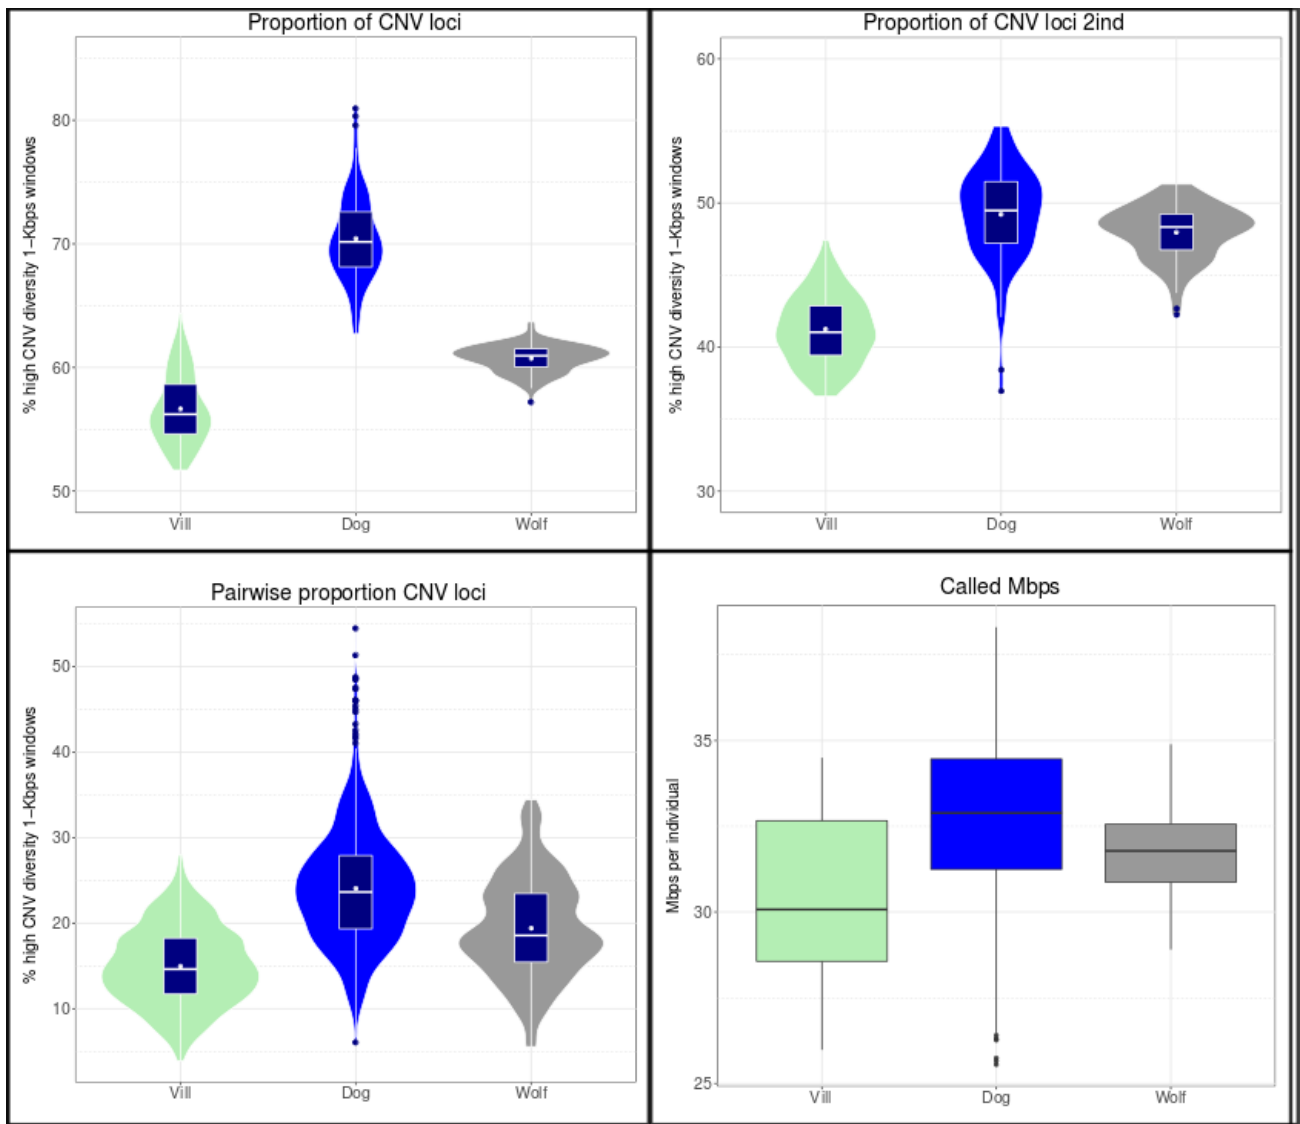

**Supplemental Figure S6** – Proportion of segregating copy number variants in village dogs (green), breed dogs (blue) and wolves (gray). Top left: raw proportions; Top right: proportions using CNV present in three or more individuals ; Bottom left: pairwise proportions of segregating CNVs; bottom right raw amount of copy number calls per subspecies.



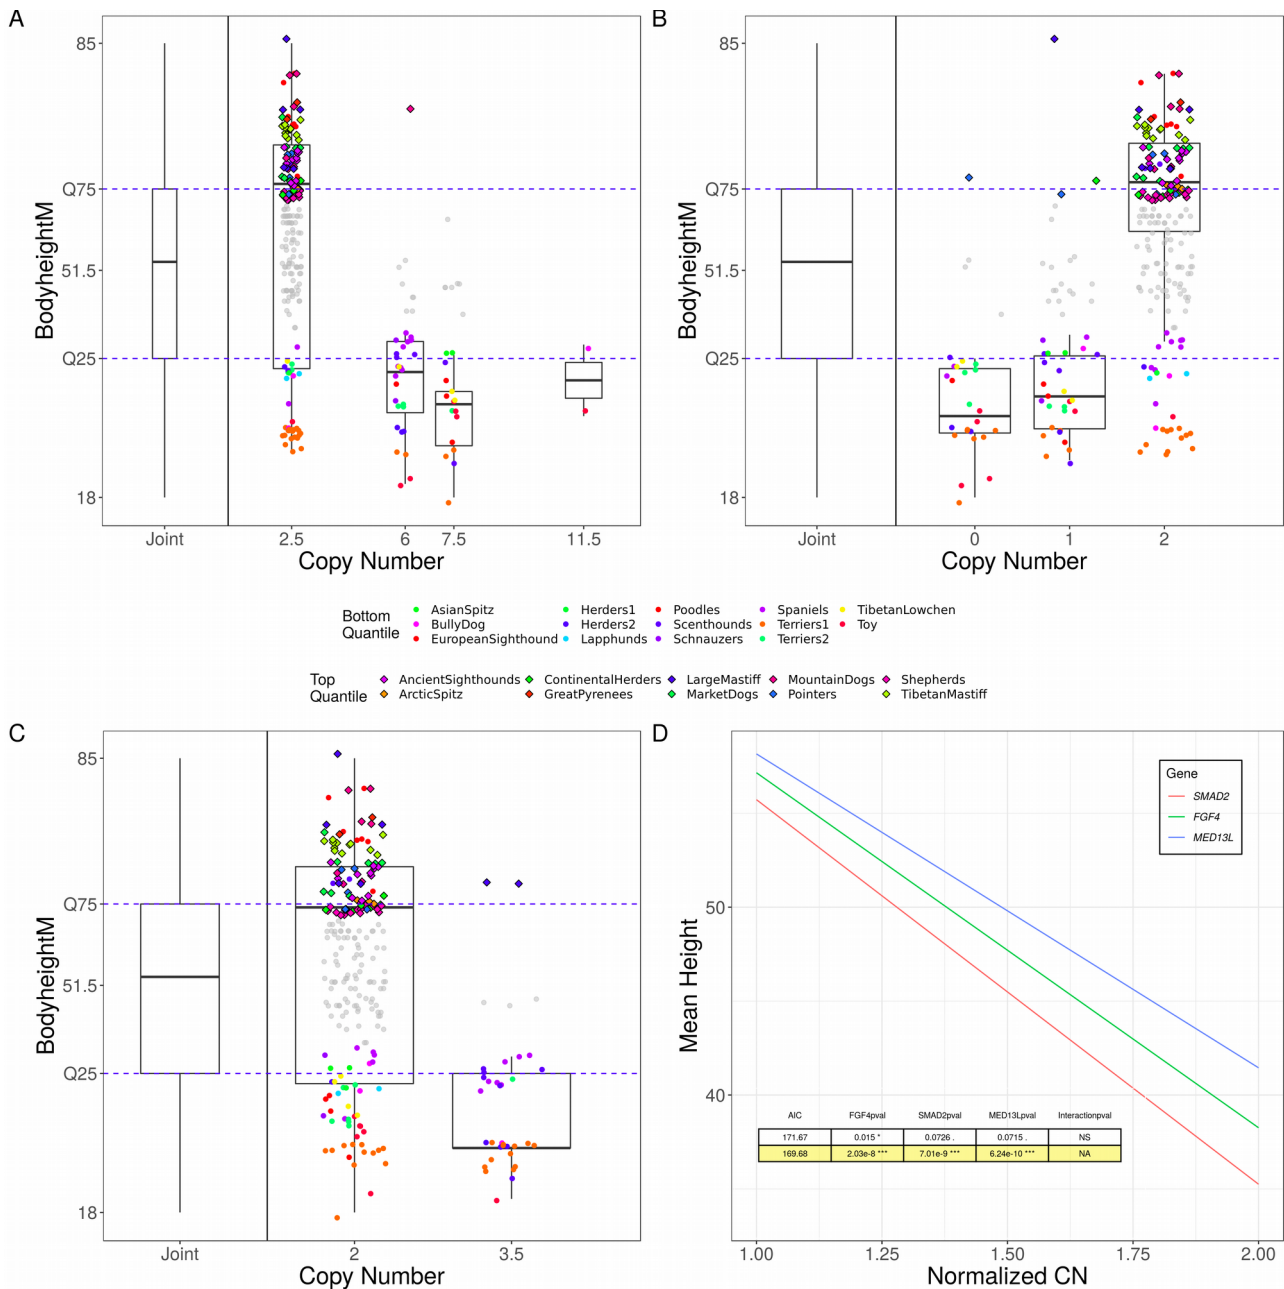

**Supplemental Figure S7. (A-C)** Boxplot dissection of the three main body mass/height associations *MED13L*, *SMAD2* and *FGF4* respectively. Breeds are colored by trait percentile. Chondrodysplastic breeds were not included in our main body height association analysis to avoid interference of the previously described *FGF4* retrogene (Chr18:48,415,710-48,416,710) with non-syndromic height variation. **(D)** Interaction plot for the three aforementioned genes. Within the plot is a table showing that the model without interaction is preferred.



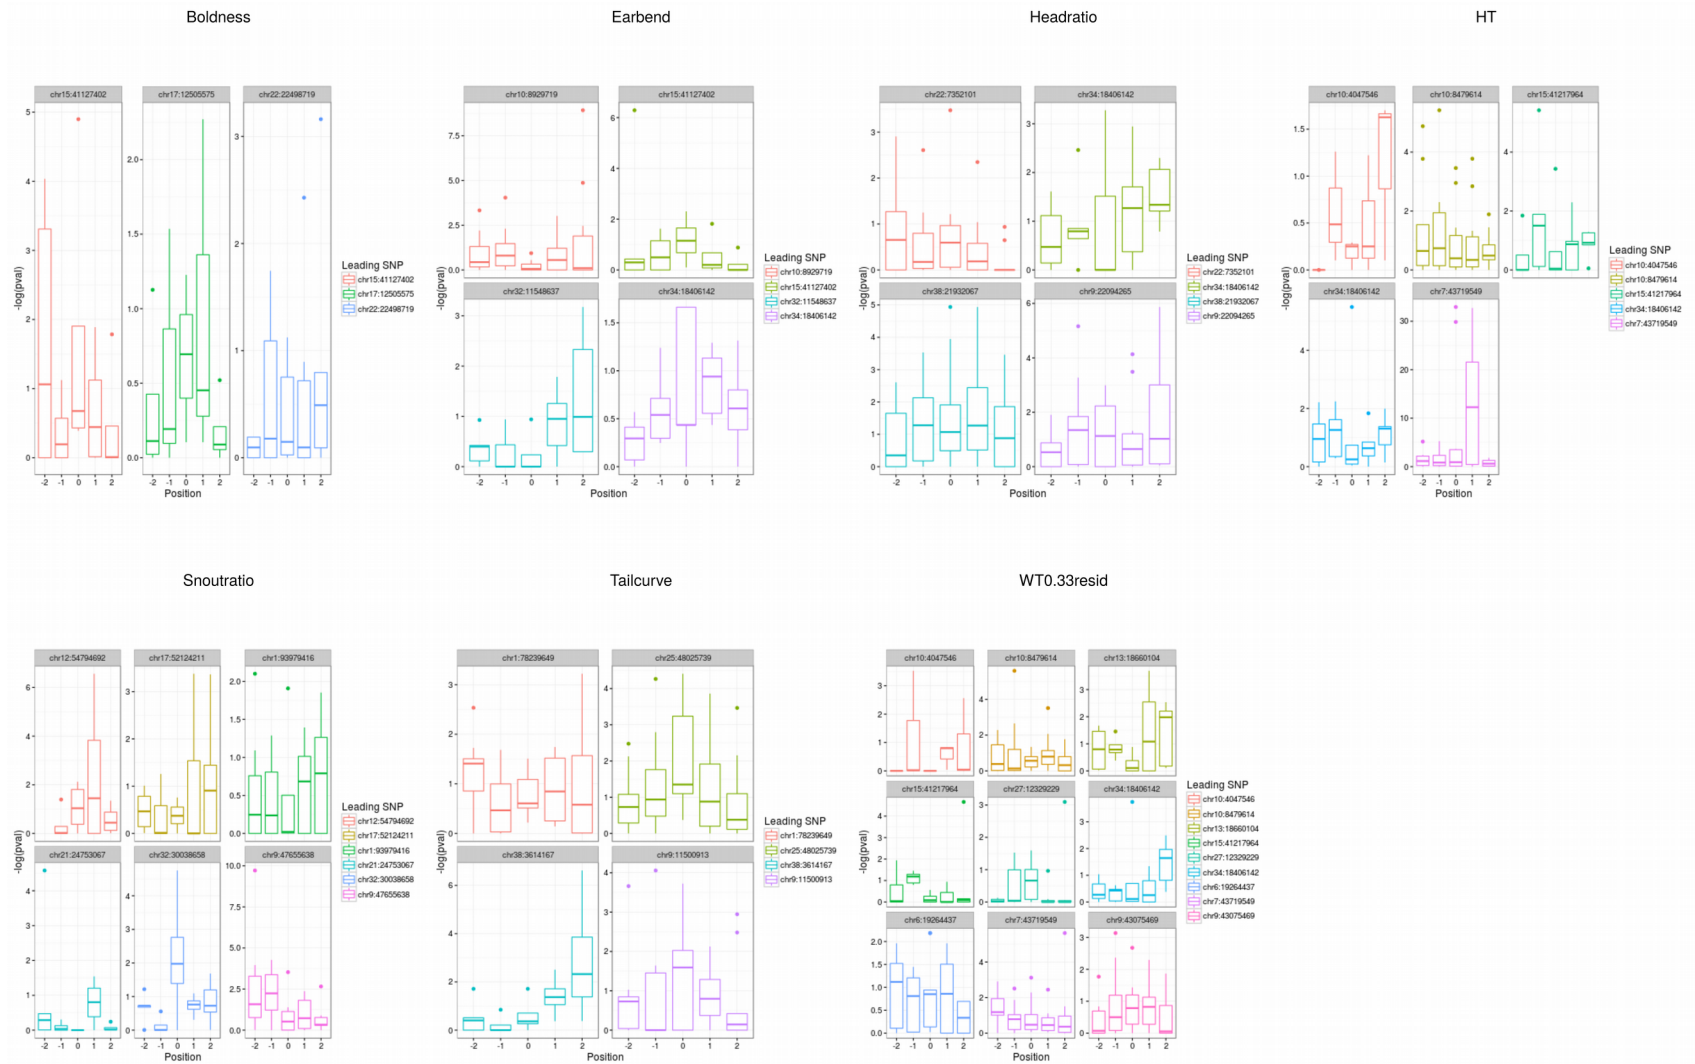

**Supplemental Figure S8** – Binned CNV p-values for associated CNVs surrounding leading SNP GWAS results for different traits (methods). The leading SNP hits have been extracted from (Plassais et al. 2019). We detect few instances where the central CNV bins show concordantly small p-values.

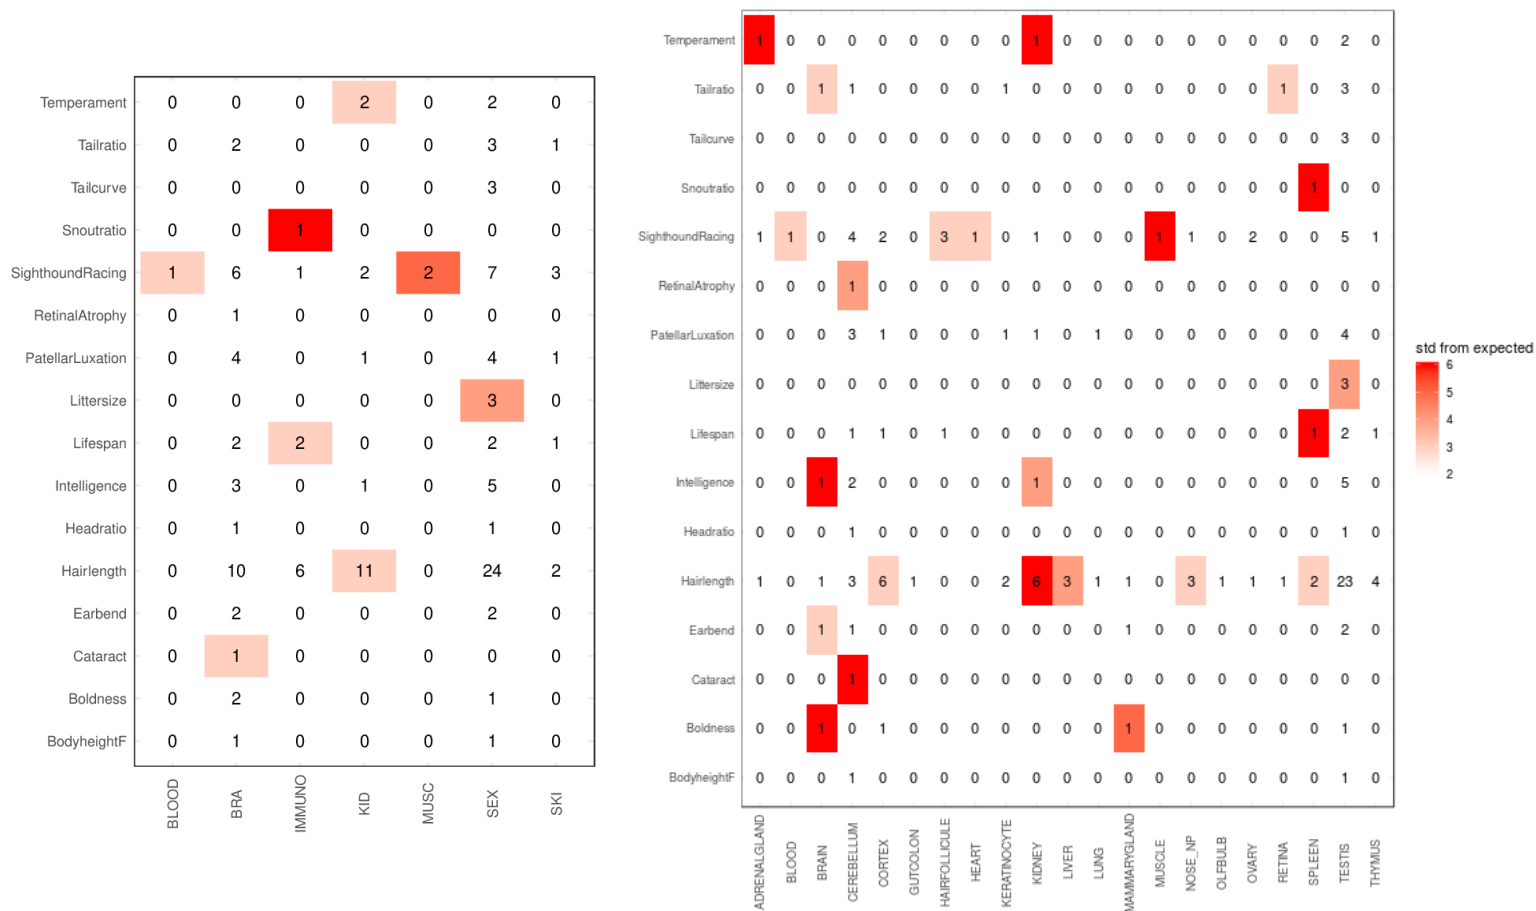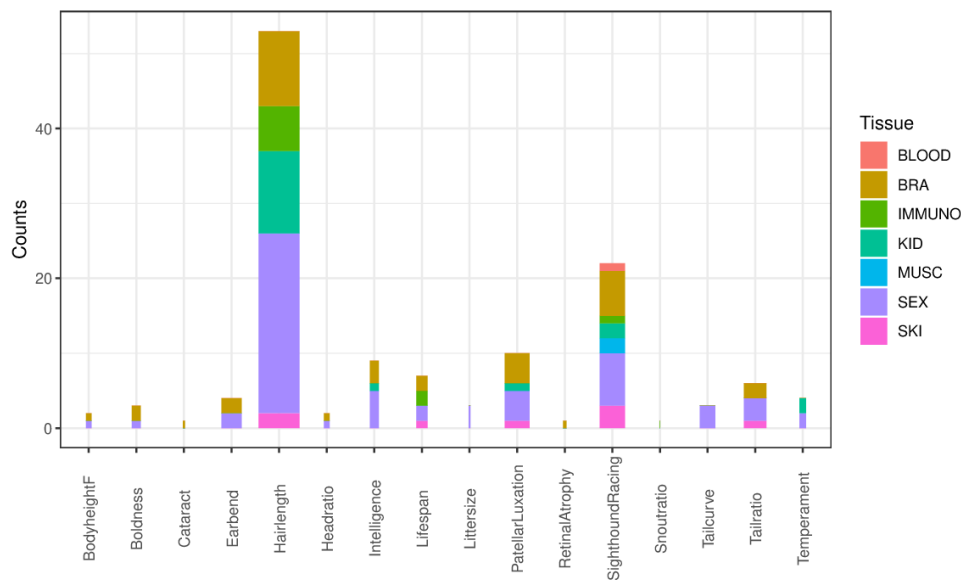

**Supplemental Figure S9** – Correlation of lncRNA tissue-specific expression and associated traits. Top: Contingency table of the two variables, the cells with exceeding counts are colored with respect to their deviation from the expected values (methods). Bottom: Alternative visualization of the variables in a stacked barplot of the tissue specific counts. The width of the bars is proportional to the number of associations within the tissue.

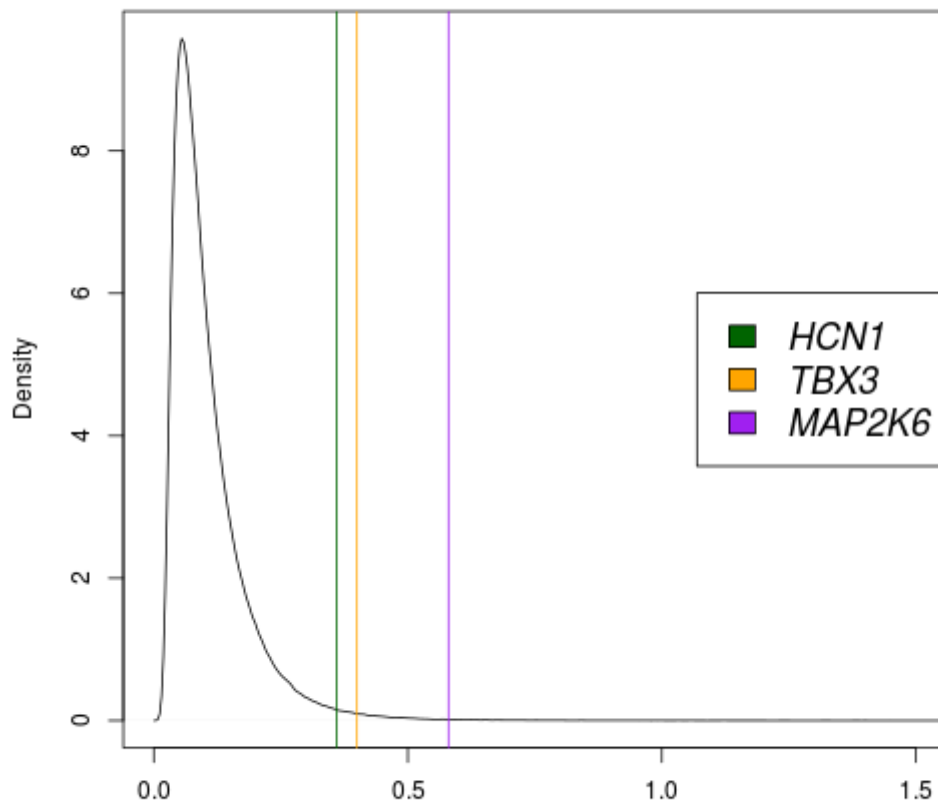

**Supplemental Figure S10** – placement of trait-associated Hi-C contacts in the empirical distribution of all normalized CNV contacts (methods). The few associations contained within distal contacts seem to be concordant with the trait they are tagging.
